# Supplementary material for: Translating natural genetic variation to gene expression in a computational model of the Drosophila gap gene regulatory network
Source: PubMed Central journal article supplement (PMC5595321; doi:10.1371/journal.pone.0184657), 2017-09-12
Supplement: pone.0184657.s004.pdf [file pone.0184657.s004.pdf]

**Table S1. Parameter values in the model.**

|                               | Hb      | Kr      | Gt      | Kni     | Bcd    | Cad     | Tll    | Hkb    |
|-------------------------------|---------|---------|---------|---------|--------|---------|--------|--------|
| $\alpha/\beta$ for <i>hb</i>  | 2572    | 11      | 473     | 704     | 3821   | 1233    | 824*   | 5488   |
| $\alpha/\beta$ for <i>Kr</i>  | 136     | 223*    | 311     | 60      | 33     | 9084*   | 3389   | 994*   |
| $\alpha/\beta$ for <i>gt</i>  | 1528    | 4251    | 8310    | 1513    | 918    | 2272    | 3613   | 1209   |
| $\alpha/\beta$ for <i>kni</i> | 3947    | 2424    | 3400    | 8974    | 5233   | 11      | 5126   | 9176   |
| $K^a$                         | 0.0057  | 0.0049  | 0.0364  | 0.0499  | 0.0080 | 0.0056* | 0.0002 | 0.0013 |
| $\omega^a$                    | 5       | 4.96    | 5       | 1       | 1      | 1*      | 4.57   | 1.13*  |
| $\tau^a$                      | 2       | 2.13    | 2       | 2       | –      | –       | –      | –      |
| $d_R^a$                       | 100     | 400     | 100     | 141     | –      | –       | –      | –      |
| $\lambda_u^a$                 | 1.14    | 1.38    | 3.07    | 1       | –      | –       | –      | –      |
| $\lambda_v^a$                 | 1.55    | 16.61   | 8.93    | 8.28    | –      | –       | –      | –      |
| $q_{\text{BTM}}$              | 1.0e–05 | 0.8e–05 | 0.5e–05 | 5.0e–05 | –      | –       | –      | –      |

The parameter values are as reported by Kozlov et al. (2014). The first four rows contain the activation efficiency parameters ( $\alpha$ , shown in red) and the repression efficiency parameters ( $\beta$ , shown in blue) for each TF (in columns) and target gene (in rows). Each TF can be either activator or repressor for a given target gene.  $K^a$  is the affinity constant for the strongest binding site of each TF.  $\omega^a$  is the cooperativity parameter.  $\tau^a$  is the delay time (in minutes).  $d_R^a$  is the repression range (in basepairs) for the short-range repression mechanism.  $\lambda_u^a$  and  $\lambda_v^a$  are  $\log_2/\text{halftime}$  (in  $\text{minutes}^{-1}$ ) for mRNA and protein, respectively.  $q_{\text{BTM}}$  is a factor by which  $Z_{\text{ON}}$  from Eq. (3) of the main text is multiplied. This parameter represents the basal level of the BTM-promotor interaction, so the statistical weights corresponding to all other ON-states are counted from that level (He et al., 2010). The parameters from the last five rows are only for the four gap genes. All parameter values in the table were found by the differential evolution optimization method minimizing the difference between the model output and the wild type gap gene expression data. The following additional parameters from the model equations were fixed during optimization:  $R_u^a = 10$ ,  $R_v^a = 30$ ,  $D_u^a = 0.015$ , and  $D_v^a = 0.15$  for each gene  $a$ . The asterisks mark poorly identifiable parameters according to the identifiability analysis (Kozlov et al., 2014).

## References

- Xin He, Md. Abul Hassan Samee, Charles Blatti, and Saurabh Sinha. Thermodynamics-based models of transcriptional regulation by enhancers: The roles of synergistic activation, cooperative binding and short-range repression. *PLoS Computational Biology*, 6:e1000935, 2010.
- Konstantin Kozlov, Vitaly Gursky, Ivan Kulakovskiy, and Maria Samsonova. Sequence-based model of gap gene regulatory network. *BMC Genomics*, 15 Suppl 12:S6, December 2014. doi: 10.1186/1471-2164-15-S12-S6.
