# Supplementary material for: Translating natural genetic variation to gene expression in a computational model of the Drosophila gap gene regulatory network
Source: PubMed Central journal article supplement (PMC5595321; doi:10.1371/journal.pone.0184657), 2017-09-12
Supplement: pone.0184657.s005.pdf [file pone.0184657.s005.pdf]

| #  | Gene      | Chrom | Position | Ref/Alt | Freq  | TFBSs |         |         |                |           |
|----|-----------|-------|----------|---------|-------|-------|---------|---------|----------------|-----------|
|    |           |       |          |         |       | TF    | Start   | End     | Word           | PWM-score |
| 1  | <i>gt</i> | X     | 2320021  | T/C     | 0.127 | Cad   | 2320014 | 2320024 | TTTTTTTATT     | 5.058     |
|    |           |       |          |         |       | Cad   | 2320017 | 2320027 | TTTTATTATA     | 5.586     |
|    |           |       |          |         |       | Hb    | 2320011 | 2320021 | ATTTTTTTTT     | 3.336     |
|    |           |       |          |         |       | Hb    | 2320012 | 2320022 | TTTTTTTTTTA    | 2.905     |
|    |           |       |          |         |       | Hb    | 2320013 | 2320023 | TTTTTTTTTAT    | 3.983     |
|    |           |       |          |         |       | Hb    | 2320014 | 2320024 | TTTTTTTATT     | 8.246     |
|    |           |       |          |         |       | Gt    | 2320012 | 2320024 | TTTTTTTTTTATT  | 4.366     |
|    |           |       |          |         |       | Gt    | 2320014 | 2320026 | TTTTTTTTTATTAT | 4.511     |
| 2  | <i>gt</i> | X     | 2320035  | T/G     | 0.051 | Cad   | 2320026 | 2320036 | ATTTATTATT     | 6.182     |
|    |           |       |          |         |       | Hb    | 2320026 | 2320036 | ATTTATTATT     | 3.256     |
|    |           |       |          |         |       | Gt    | 2320031 | 2320043 | TTATTATAGATC   | 4.308     |
| 3  | <i>gt</i> | X     | 2320036  | T/G     | 0.026 | Cad   | 2320026 | 2320036 | ATTTATTATT     | 6.182     |
|    |           |       |          |         |       | Hb    | 2320026 | 2320036 | ATTTATTATT     | 3.256     |
|    |           |       |          |         |       | Gt    | 2320031 | 2320043 | TTATTATAGATC   | 4.308     |
| 4  | <i>gt</i> | X     | 2320037  | A/G     | 0.026 | Gt    | 2320031 | 2320043 | TTATTATAGATC   | 4.308     |
| 5  | <i>gt</i> | X     | 2320041  | A/T     | 0.011 | Gt    | 2320031 | 2320043 | TTATTATAGATC   | 4.308     |
| 6  | <i>gt</i> | X     | 2323038  | C/G     | 0.134 | Bcd   | 2323032 | 2323039 | AAAATCC        | 4.076     |
|    |           |       |          |         |       | Hb    | 2323028 | 2323038 | ACCGAAAATC     | 3.368     |
| 7  | <i>gt</i> | X     | 2323129  | C/G     | 0.019 | Kr    | 2323127 | 2323138 | CCAAAGGGCAA    | 5.406     |
|    |           |       |          |         |       | Tll   | 2323122 | 2323132 | AAAGGCCAAA     | 6.825     |
| 8  | <i>gt</i> | X     | 2324364  | G/A     | 0.024 | Hkb   | 2324359 | 2324369 | TGCGGCGTGG     | 5.046     |
| 9  | <i>gt</i> | X     | 2324393  | T/G     | 0.019 | Kni   | 2324389 | 2324402 | TTGTTTCACTTTG  | 5.520     |
|    |           |       |          |         |       | Tll   | 2324392 | 2324402 | TTTCACTTTG     | 4.538     |
| 10 | <i>gt</i> | X     | 2324921  | A/T     | 0.005 | Hb    | 2324917 | 2324927 | TGTA AAAACC    | 3.057     |
|    |           |       |          |         |       | Tll   | 2324920 | 2324930 | AAAAACCAGA     | 5.134     |
| 11 | <i>gt</i> | X     | 2325006  | C/G     | 0.244 | Cad   | 2325003 | 2325013 | CGCCATAATG     | 4.534     |
| 12 | <i>gt</i> | X     | 2325223  | G/A     | 0.113 | Cad   | 2325221 | 2325231 | GGCCCTAAAA     | 5.009     |
| 13 | <i>gt</i> | X     | 2325238  | C/T     | 0.014 | Kni   | 2325231 | 2325244 | CCGCTGCAGTTTT  | 6.284     |
| 14 | <i>gt</i> | X     | 2325239  | A/T     | 0.373 | Kni   | 2325231 | 2325244 | CCGCTGCAGTTTT  | 6.284     |
| 15 | <i>gt</i> | X     | 2325334  | T/C     | 0.142 | Cad   | 2325330 | 2325340 | TTATATTGGT     | 4.949     |
|    |           |       |          |         |       | Hb    | 2325325 | 2325335 | GATTTTTATA     | 3.719     |
|    |           |       |          |         |       | Hb    | 2325327 | 2325337 | TTTTTATATT     | 4.815     |
| 16 | <i>gt</i> | X     | 2325381  | G/A     | 0.005 | Kr    | 2325379 | 2325390 | TGAAAGGGGTT    | 7.269     |
|    |           |       |          |         |       | Kr    | 2325380 | 2325391 | GAAAGGGGTTT    | 7.609     |
| 17 | <i>gt</i> | X     | 2325413  | C/A     | 0.005 | Kr    | 2325409 | 2325420 | CCACCCGTCCA    | 4.659     |
| 18 | <i>gt</i> | X     | 2325427  | G/A     | 0.005 | Kr    | 2325420 | 2325431 | AAAAAGGGTGA    | 7.957     |
| 19 | <i>gt</i> | X     | 2327069  | A/G     | 0.464 | Hb    | 2327063 | 2327073 | AGCAAAGAA      | 5.411     |
| 20 | <i>gt</i> | X     | 2329021  | T/A     | 0.005 | Gt    | 2329012 | 2329024 | ATGTTACGTTAC   | 7.616     |
|    |           |       |          |         |       | Gt    | 2329014 | 2329026 | GTTACGTTACAT   | 4.940     |
| 21 | <i>gt</i> | X     | 2329112  | T/C     | 0.308 | Cad   | 2329111 | 2329121 | TGCAATAAAG     | 5.704     |
| 22 | <i>gt</i> | X     | 2329129  | C/A     | 0.014 | Kni   | 2329116 | 2329129 | TAAAGTAGAGCTC  | 6.437     |
| 23 | <i>gt</i> | X     | 2329182  | A/G     | 0.009 | Hb    | 2329177 | 2329187 | TTCGAAAAAC     | 3.289     |
|    |           |       |          |         |       | Gt    | 2329175 | 2329187 | ATTCGAAAAAC    | 4.155     |
| 24 | <i>gt</i> | X     | 2329338  | G/A     | 0.005 | Hkb   | 2329329 | 2329339 | GGAGGTGGGG     | 3.922     |
| 25 | <i>gt</i> | X     | 2330586  | C/A     | 0.009 | Kni   | 2330584 | 2330597 | GCGCTCAATTTTT  | 5.265     |
| 26 | <i>gt</i> | X     | 2331029  | A/T     | 0.225 | Kni   | 2331028 | 2331041 | AGAATCCGAGCAG  | 5.675     |
| 27 | <i>gt</i> | X     | 2331091  | T/A     | 0.009 | Gt    | 2331082 | 2331094 | TTGTTGGTTAAT   | 6.626     |
| 28 | <i>gt</i> | X     | 2331288  | C/T     | 0.272 | Tll   | 2331282 | 2331292 | TTCGACTTTG     | 6.545     |
| 29 | <i>gt</i> | X     | 2332432  | C/A     | 0.009 | Kr    | 2332427 | 2332438 | CAATCCCTTGC    | 4.946     |
| 30 | <i>gt</i> | X     | 2332803  | G/A     | 0.024 | Kni   | 2332793 | 2332806 | GGATTTAGCGCAA  | 4.875     |
|    |           |       |          |         |       | Hb    | 2332801 | 2332811 | CGCAAACAGA     | 3.028     |
| 31 | <i>gt</i> | X     | 2332929  | G/A     | 0.005 | Kni   | 2332923 | 2332936 | GCATCGGGATCAG  | 4.846     |
| 32 | <i>gt</i> | X     | 2333163  | C/G     | 0.033 | Bcd   | 2333157 | 2333164 | GTAATCC        | 6.044     |
| 33 | <i>gt</i> | X     | 2333974  | T/C     | 0.352 | Tll   | 2333971 | 2333981 | TTTGATCTTT     | 5.398     |
| 34 | <i>gt</i> | X     | 2334048  | G/A     | 0.005 | Kr    | 2334045 | 2334056 | CCGAAGGATAA    | 4.786     |

| #  | Gene      | Chrom | Position | Ref/Alt | Freq  | TFBSs |         |         |               |           |
|----|-----------|-------|----------|---------|-------|-------|---------|---------|---------------|-----------|
|    |           |       |          |         |       | TF    | Start   | End     | Word          | PWM-score |
| 35 | <i>hb</i> | 3R    | 4520484  | T/C     | 0.005 | Kni   | 4520474 | 4520487 | TTGATCCATTCTG | 4.647     |
| 36 | <i>hb</i> | 3R    | 4522364  | A/G     | 0.005 | Cad   | 4522356 | 4522366 | GGCAAAAAAC    | 4.800     |
|    |           |       |          |         |       | Kni   | 4522361 | 4522374 | AAAACAAGTTCAC | 6.057     |
|    |           |       |          |         |       | Hb    | 4522355 | 4522365 | GGGCAAAAAA    | 3.423     |
|    |           |       |          |         |       | Hb    | 4522356 | 4522366 | GGCAAAAAAC    | 8.497     |
| 37 | <i>hb</i> | 3R    | 4523422  | G/T     | 0.005 | Cad   | 4523415 | 4523425 | TTTAATGGCA    | 5.382     |
| 38 | <i>hb</i> | 3R    | 4523654  | A/G     | 0.014 | Hb    | 4523647 | 4523657 | AAGCAAAAAC    | 3.595     |
|    |           |       |          |         |       | Hb    | 4523648 | 4523658 | AGCAAAAACA    | 5.729     |
|    |           |       |          |         |       | Gt    | 4523644 | 4523656 | GCAAAGCAAAAA  | 3.865     |
| 39 | <i>hb</i> | 3R    | 4523696  | C/T     | 0.005 | Hkb   | 4523691 | 4523701 | AGAGCCGTTA    | 4.367     |
| 40 | <i>hb</i> | 3R    | 4523824  | A/G     | 0.005 | Gt    | 4523820 | 4523832 | CAAAAGCAATAA  | 3.954     |
| 41 | <i>hb</i> | 3R    | 4524787  | C/A     | 0.009 | Kni   | 4524776 | 4524789 | AACAACAGAGCAA | 5.714     |
|    |           |       |          |         |       | Hb    | 4524784 | 4524794 | AGCAAACAAA    | 5.431     |
| 42 | <i>hb</i> | 3R    | 4524952  | G/T     | 0.019 | Bcd   | 4524945 | 4524952 | GACTTAG       | 4.273     |
|    |           |       |          |         |       | Hb    | 4524950 | 4524960 | AGCGAAGAAA    | 3.285     |
| 43 | <i>hb</i> | 3R    | 4524991  | C/G     | 0.009 | Hkb   | 4524989 | 4524999 | GCCCGCCAG     | 5.084     |
| 44 | <i>hb</i> | 3R    | 4525176  | G/A     | 0.023 | Bcd   | 4525169 | 4525176 | CGATTAG       | 4.740     |
| 45 | <i>hb</i> | 3R    | 4525279  | T/C     | 0.028 | Hb    | 4525276 | 4525286 | CATAACAAAT    | 3.095     |
|    |           |       |          |         |       | Gt    | 4525272 | 4525284 | AGGACATAACAA  | 4.366     |
| 46 | <i>hb</i> | 3R    | 4525771  | C/T     | 0.005 | Hb    | 4525763 | 4525773 | TTTCTTTCCT    | 4.496     |
| 47 | <i>hb</i> | 3R    | 4526184  | T/C     | 0.005 | Hb    | 4526174 | 4526184 | ACCAAACAAT    | 3.099     |
| 48 | <i>hb</i> | 3R    | 4526441  | G/A     | 0.029 | Hkb   | 4526436 | 4526446 | ACGGGCGTTC    | 5.548     |
| 49 | <i>hb</i> | 3R    | 4526793  | A/C     | 0.088 | Gt    | 4526792 | 4526804 | AAGACACACAAA  | 4.508     |
| 50 | <i>hb</i> | 3R    | 4526924  | C/T     | 0.019 | Kr    | 4526919 | 4526930 | CATCCCATTTC   | 4.485     |
| 51 | <i>hb</i> | 3R    | 4526964  | G/A     | 0.009 | Cad   | 4526957 | 4526967 | TTTTATGACC    | 8.683     |
|    |           |       |          |         |       | Hb    | 4526954 | 4526964 | GTTTTTTATG    | 8.489     |
|    |           |       |          |         |       | Hb    | 4526956 | 4526966 | TTTTTATGAC    | 3.980     |
| 52 | <i>hb</i> | 3R    | 4527104  | T/G     | 0.009 | Hb    | 4527100 | 4527110 | GTTTTCTCCT    | 3.743     |
|    |           |       |          |         |       | Gt    | 4527093 | 4527105 | GCTTTGCGTTTT  | 4.353     |
| 53 | <i>hb</i> | 3R    | 4527146  | C/G     | 0.048 | Hb    | 4527145 | 4527155 | CTTCTTTATG    | 4.247     |
|    |           |       |          |         |       | Tll   | 4527140 | 4527150 | ATTGTCTTCT    | 4.960     |
| 54 | <i>hb</i> | 3R    | 4531424  | G/T     | 0.009 | Hb    | 4531414 | 4531424 | TTTGTTTAAG    | 4.032     |
| 55 | <i>hb</i> | 3R    | 4531521  | G/A     | 0.024 | Gt    | 4531519 | 4531531 | TGTTTGTGTGTT  | 4.075     |
| 56 | <i>hb</i> | 3R    | 4531528  | T/A     | 0.005 | Gt    | 4531519 | 4531531 | TGTTTGTGTGTT  | 4.075     |
| 57 | <i>hb</i> | 3R    | 4531588  | G/T     | 0.009 | Kni   | 4531585 | 4531598 | TTGGTCTAATATA | 4.462     |

| #  | Gene       | Chrom | Position | Ref/Alt | Freq  | TFBSs |          |          |               |           |
|----|------------|-------|----------|---------|-------|-------|----------|----------|---------------|-----------|
|    |            |       |          |         |       | TF    | Start    | End      | Word          | PWM-score |
| 58 | <i>kni</i> | 3L    | 20688664 | G/T     | 0.196 | Hkb   | 20688659 | 20688669 | GCACGCACAC    | 5.016     |
| 59 | <i>kni</i> | 3L    | 20688755 | C/A     | 0.005 | Kr    | 20688753 | 20688764 | TCACTCATTCA   | 4.681     |
| 60 | <i>kni</i> | 3L    | 20688778 | G/A     | 0.067 | Hkb   | 20688768 | 20688778 | TCACGCTCAG    | 4.613     |
| 61 | <i>kni</i> | 3L    | 20688857 | T/G     | 0.005 | Hb    | 20688852 | 20688862 | TTTATTTATT    | 4.591     |
| 62 | <i>kni</i> | 3L    | 20688962 | A/T     | 0.005 | Hb    | 20688954 | 20688964 | CATTTTTAAC    | 3.411     |
| 63 | <i>kni</i> | 3L    | 20688981 | G/C     | 0.014 | Cad   | 20688973 | 20688983 | TTTTTTTGGC    | 5.701     |
|    |            |       |          |         |       | Cad   | 20688974 | 20688984 | TTTTTTTGGCA   | 5.099     |
|    |            |       |          |         |       | Hb    | 20688972 | 20688982 | ATTTTTTTGG    | 3.112     |
|    |            |       |          |         |       | Hb    | 20688973 | 20688983 | TTTTTTTGGC    | 7.849     |
|    |            |       |          |         |       | Hb    | 20688974 | 20688984 | TTTTTTTGGCA   | 3.003     |
|    |            |       |          |         |       | Gt    | 20688973 | 20688985 | TTTTTTTGGCAT  | 4.100     |
| 64 | <i>kni</i> | 3L    | 20689895 | A/T     | 0.005 | Cad   | 20689887 | 20689897 | TATTATAAAA    | 4.688     |
|    |            |       |          |         |       | Gt    | 20689888 | 20689900 | ATTATAAAATAT  | 4.617     |
|    |            |       |          |         |       | Gt    | 20689893 | 20689905 | AAAATATAAAAC  | 4.680     |
| 65 | <i>kni</i> | 3L    | 20689965 | C/T     | 0.120 | Tll   | 20689959 | 20689969 | GCTGACTTCC    | 5.853     |
| 66 | <i>kni</i> | 3L    | 20690032 | G/T     | 0.143 | Kni   | 20690025 | 20690038 | AAAACGGGAAAAA | 5.129     |
|    |            |       |          |         |       | Kr    | 20690025 | 20690036 | AAAACGGGAAA   | 4.566     |
|    |            |       |          |         |       | Hb    | 20690029 | 20690039 | CGGGAAAAAAA   | 5.658     |
|    |            |       |          |         |       | Hb    | 20690030 | 20690040 | GGGAAAAAAC    | 7.286     |
| 67 | <i>kni</i> | 3L    | 20690657 | A/T     | 0.019 | Kni   | 20690650 | 20690663 | CAAACAAGAGCAC | 8.372     |
|    |            |       |          |         |       | Hb    | 20690648 | 20690658 | GCCAAACAAG    | 3.265     |
| 68 | <i>kni</i> | 3L    | 20690799 | C/T     | 0.005 | Tll   | 20690792 | 20690802 | AAAAGTCAAT    | 8.990     |
| 69 | <i>kni</i> | 3L    | 20692902 | C/A     | 0.009 | Kni   | 20692891 | 20692904 | GGAAATGCGGCAA | 4.444     |
| 70 | <i>kni</i> | 3L    | 20693004 | G/T     | 0.005 | Hb    | 20693000 | 20693010 | CTTGTTTGAT    | 3.245     |
| 71 | <i>kni</i> | 3L    | 20693120 | T/A     | 0.009 | Bcd   | 20693118 | 20693125 | CTAATGC       | 4.109     |

| #  | Gene      | Chrom | Position | Ref/Alt | Freq  | TFBSs |          |          |               |           |
|----|-----------|-------|----------|---------|-------|-------|----------|----------|---------------|-----------|
|    |           |       |          |         |       | TF    | Start    | End      | Word          | PWM-score |
| 72 | <i>Kr</i> | 2R    | 21106810 | C/A     | 0.01  | Kni   | 21106809 | 21106822 | CTGATTTATTTGT | 4.459     |
|    |           |       |          |         |       | Tll   | 21106808 | 21106818 | TCTGATTTAT    | 4.392     |
| 73 | <i>Kr</i> | 2R    | 21106823 | G/A     | 0.387 | Hb    | 21106813 | 21106823 | TTTATTTGTG    | 5.456     |
|    |           |       |          |         |       | Hb    | 21106820 | 21106830 | GTGTTTTATG    | 4.741     |
|    |           |       |          |         |       | Hb    | 21106822 | 21106832 | GTTTTATGTC    | 4.885     |
| 74 | <i>Kr</i> | 2R    | 21106902 | T/A     | 0.024 | Hb    | 21106900 | 21106910 | GTGGAAAAAA    | 3.776     |
|    |           |       |          |         |       | Hb    | 21106901 | 21106911 | TGGAAAAAAC    | 5.654     |
| 75 | <i>Kr</i> | 2R    | 21110483 | C/G     | 0.271 | Kr    | 21110476 | 21110487 | AAATCCCTCTG   | 4.515     |
| 76 | <i>Kr</i> | 2R    | 21110775 | T/C     | 0.051 | Tll   | 21110769 | 21110779 | AAATGTCAAA    | 5.566     |
| 77 | <i>Kr</i> | 2R    | 21110799 | T/G     | 0.348 | Hb    | 21110789 | 21110799 | TGCAAAAAAT    | 5.314     |
| 78 | <i>Kr</i> | 2R    | 21112768 | T/C     | 0.343 | Hb    | 21112762 | 21112772 | TTGTTTTGGT    | 4.520     |
| 79 | <i>Kr</i> | 2R    | 21112791 | T/A     | 0.207 | Tll   | 21112785 | 21112795 | TGAAGTCGAA    | 4.631     |
| 80 | <i>Kr</i> | 2R    | 21113102 | T/C     | 0.009 | Cad   | 21113098 | 21113108 | ATTTTTTATT    | 4.306     |
|    |           |       |          |         |       | Cad   | 21113101 | 21113111 | TTTTATTATA    | 5.586     |
|    |           |       |          |         |       | Hb    | 21113098 | 21113108 | ATTTTTTATT    | 6.628     |
| 81 | <i>Kr</i> | 2R    | 21113108 | T/G     | 0.317 | Cad   | 21113098 | 21113108 | ATTTTTTATT    | 4.306     |
|    |           |       |          |         |       | Cad   | 21113101 | 21113111 | TTTTATTATA    | 5.586     |
|    |           |       |          |         |       | Hb    | 21113098 | 21113108 | ATTTTTTATT    | 6.628     |
|    |           |       |          |         |       | Gt    | 21113103 | 21113115 | TTATTATATTTTC | 5.124     |
| 82 | <i>Kr</i> | 2R    | 21113130 | C/T     | 0.005 | Kr    | 21113125 | 21113136 | GAATCCGTTTT   | 5.116     |
| 83 | <i>Kr</i> | 2R    | 21113139 | A/G     | 0.024 | Cad   | 21113131 | 21113141 | GTTTTTTACT    | 4.234     |
|    |           |       |          |         |       | Hb    | 21113131 | 21113141 | GTTTTTTACT    | 8.361     |
| 84 | <i>Kr</i> | 2R    | 21113279 | C/T     | 0.023 | Cad   | 21113269 | 21113279 | GGTAAAAAAC    | 4.696     |
|    |           |       |          |         |       | Hb    | 21113269 | 21113279 | GGTAAAAAAC    | 7.942     |
| 85 | <i>Kr</i> | 2R    | 21113423 | C/A     | 0.009 | Kni   | 21113416 | 21113429 | CTGTTTCATTTTC | 6.024     |
| 86 | <i>Kr</i> | 2R    | 21113555 | C/T     | 0.005 | Hb    | 21113552 | 21113562 | CTCTAAAAAC    | 3.931     |
|    |           |       |          |         |       | Hb    | 21113572 | 21113582 | TCTTTATGTG    | 2.968     |
|    |           |       |          |         |       | Gt    | 21113577 | 21113589 | ATGTGGTGTAAT  | 4.209     |
| 87 | <i>Kr</i> | 2R    | 21113582 | G/T     | 0.005 | Gt    | 21113579 | 21113591 | GTGGTGTAATAT  | 4.611     |
|    |           |       |          |         |       | Gt    | 21113577 | 21113589 | ATGTGGTGTAAT  | 4.209     |
| 88 | <i>Kr</i> | 2R    | 21113686 | C/T     | 0.390 | Kni   | 21113680 | 21113693 | TAGTTCTGATTTT | 5.310     |
|    |           |       |          |         |       | Tll   | 21113684 | 21113694 | TCTGATTTTT    | 6.239     |
| 89 | <i>Kr</i> | 2R    | 21113857 | A/C     | 0.005 | Kni   | 21113852 | 21113865 | TCGCACCAATTTG | 6.066     |
| 90 | <i>Kr</i> | 2R    | 21113974 | T/A     | 0.005 | Hb    | 21113972 | 21113982 | GTTTTTCGCT    | 6.493     |
|    |           |       |          |         |       | Gt    | 21113972 | 21113984 | GTTTTTCGCTTT  | 3.898     |
