# Supplementary material for: Translating natural genetic variation to gene expression in a computational model of the Drosophila gap gene regulatory network
Source: PubMed Central journal article supplement (PMC5595321; doi:10.1371/journal.pone.0184657), 2017-09-12

Purely positive SNPs

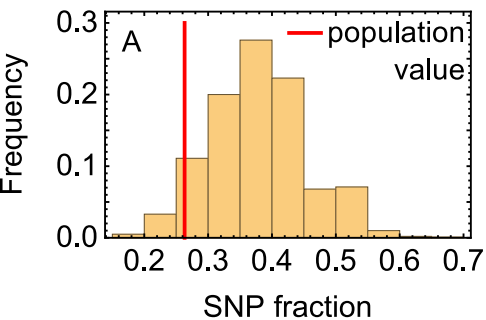

Purely negative SNPs

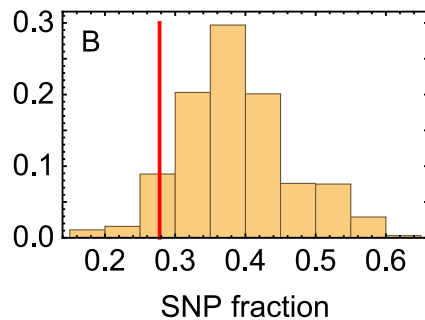

Sign alternating SNPs

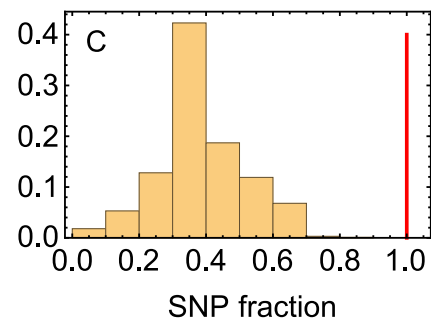

Fraction of SNPs from multiple TFBSs

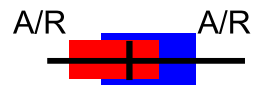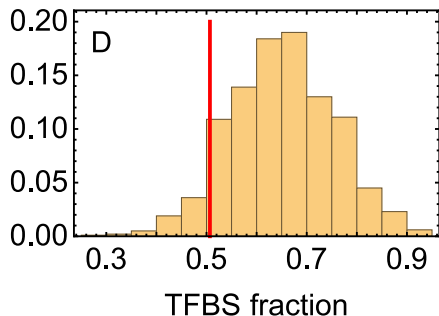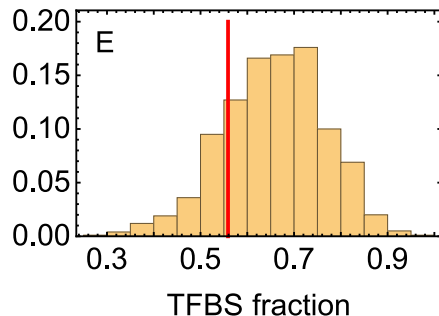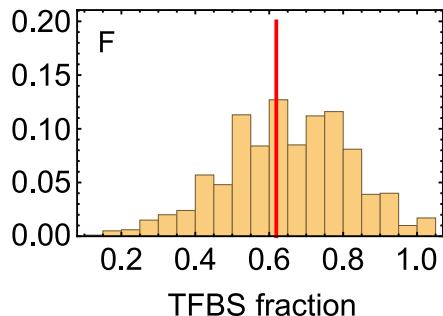

Fraction of AA or RR types of TFBS overlaps

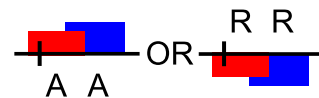

Supplement: pone.0184657.s009.pdf [file pone.0184657.s009.pdf]
