# Supplementary material for: Translating natural genetic variation to gene expression in a computational model of the Drosophila gap gene regulatory network
Source: PubMed Central journal article supplement (PMC5595321; doi:10.1371/journal.pone.0184657), 2017-09-12

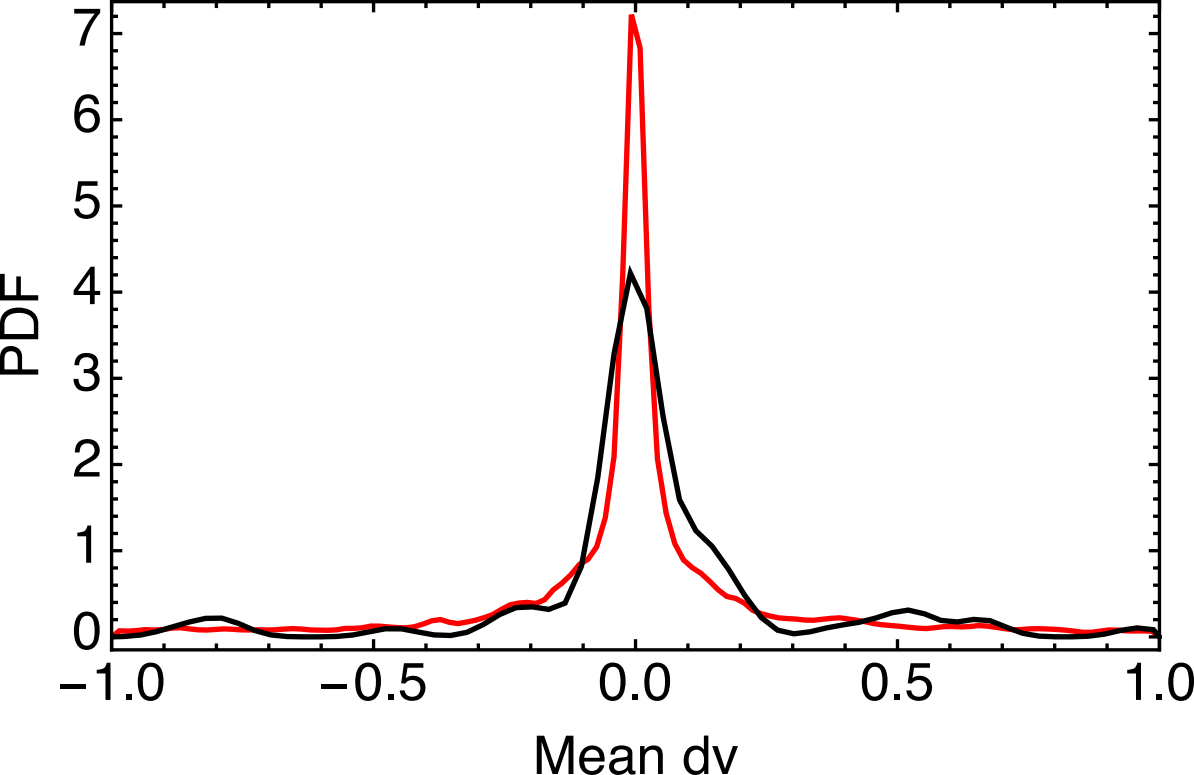

Supplement: pone.0184657.s015.pdf [file pone.0184657.s015.pdf]
